# Supplementary material for: The Expression Profiling of the Lipoxygenase (LOX) Family Genes During Fruit Development, Abiotic Stress and Hormonal Treatments in Cucumber (Cucumis sativus L.)
Source: MDPI journal article supplement (doi:10.3390/ijms13022481), 2012-02-22
Supplement: s1 [file s1]

## Supplementary Information

**Supplemental Table 1. Expression of CsLOX genes in cucumber tissues.**

[illegible]

MF: male flower; FF: female flower; O: ovary; 2d: 2 days old fruit; 10: 10 days old fruit; C: cotyledon; TF: true leaf; R: root; S: stem; T: tendril

**Supplemental Table 2.** Expression of cucumber fruit LOX genes in response to ABA, Cold, wound, MeJA, ACC, NaCl and KCl treatments.

[illegible]

**Supplemental Table 3.** Primers used in semi-quantitative RT-PCR and Quantitative Real-time PCR analysis of cucumber *LOX* genes.

| Gene ID        | Forward primers (5' to 3') | Reverse primers (5' to 3')  |
|----------------|----------------------------|-----------------------------|
| <i>CsLOX1</i>  | AGGACTTCCTGTTCCATTGGA      | TGGAGGAAATTCCTTAAGACGA      |
| <i>CsLOX2</i>  | TCCAATTCATAAGCTACTTGTTCCT  | ACCTTTCTCTCTCTTGATGAGATCA   |
| <i>CsLOX3</i>  | TCCCGAAGTTGTCAAAGATAATAAA  | TGTTGCATTCATCCTCATCAA       |
| <i>CsLOX4</i>  | TCCCATTGGTTGAATACACAT      | GCTTGTTCAAGGAAATTCCA        |
| <i>CsLOX5</i>  | TTATCAGCCACTGGCTGAATAC     | GAAGACCCAATTCTTGTAAGCA      |
| <i>CsLOX6</i>  | GCACTTGAAAGAATCAGATTTTCTT  | CCAGACTTATTATCTTGATGACTTG   |
| <i>CsLOX7</i>  | CATTTTCAATCAAAAAGGAATGG    | CAATTAACACTTCTAGGGTTTCCA    |
| <i>CsLOX8</i>  | TCCTGCTGACAAATACAAAACC     | CTTTTTGGATCTTTTTTGAAGG      |
| <i>CsLOX9</i>  | TCGTCTCCTAGAGTTCCTCC       | AATCATTCACGGCGACATAA        |
| <i>CsLOX10</i> | TGGGAGAAGAAGCATACTTAGAGG   | GGAAGATAGCTCTGGTTGAGAAAG    |
| <i>CsLOX11</i> | TGGCATTGCACTCCCATC         | TAAAGCCATGTGCACGAGG         |
| <i>CsLOX12</i> | TTAAGTTCCGCTTTCAGCCTC      | TCTTGATCAATCATTTCCGGTGT     |
| <i>CsLOX13</i> | GGTTTATCGACACCATTACTATTGA  | CAAATGCATTACGCTTCTTTTTA     |
| <i>CsLOX14</i> | TTATCCACTGGCTTAGAGCTCA     | AATCGCCACTGATCTCTGTACA      |
| <i>CsLOX15</i> | TCTTCCAACAAGTCTTATTTGTCTG  | GAAAATTAAGATACCATTTTGAGTAAG |
| <i>CsLOX16</i> | TATAGCGCAAAAAGAAATTGTTCTG  | TGGGCTTTAGCAAGCCTC          |
| <i>CsLOX17</i> | CAGACCTGCTGAAAAGAAAGATG    | GTAGTGTGGCCATTTCATACCA      |
| <i>CsLOX18</i> | TAGCAATGAGATGGATCCAAGAT    | AGATGATATTGTGTTGGAATTCCA    |
| <i>CsLOX19</i> | CTCATTGGCTGAGAACTCATTG     | TGAATTAAGTCAGCAGGTAAAGCT    |
| <i>CsLOX20</i> | TTGCTTCCAATAAGATGGGAC      | TCCCGTTACAGGATCAACCT        |
| <i>CsLOX21</i> | GTTTATTTTGGATTACCACGACCT   | TCTCCAAAGCCAGAGGCTAG        |
| <i>CsLOX22</i> | TCTCTAATAAGCCTTATCTTCCAGGT | TGCAGTCATATCAGTCTCGGA       |
| <i>CsLOX23</i> | TAAATCATTTGGTTAAGGACTCACG  | CCATACCCCTTCGAATAAGATC      |
| <i>CsUBQ</i>   | GGTGCCAAGAAGCGTAAGAA       | CACCAGCTTTGTTGTAAACGT       |
| <i>CsACT</i>   | TCCACGAGACTACCTACAACCTC    | GCTCATACGGTCAGCGAT          |
